# Supplementary material for: Mechanism of single-stranded DNA annealing by RAD52–RPA complex
Source: PubMed Central journal article supplement (PMC11096129; doi:10.1038/s41586-024-07347-7), 2024-04-24

**Supplementary information**

---

**Mechanism of single-stranded DNA  
annealing by RAD52–RPA complex**

---

In the format provided by the  
authors and unedited

section used for Fig. 1e

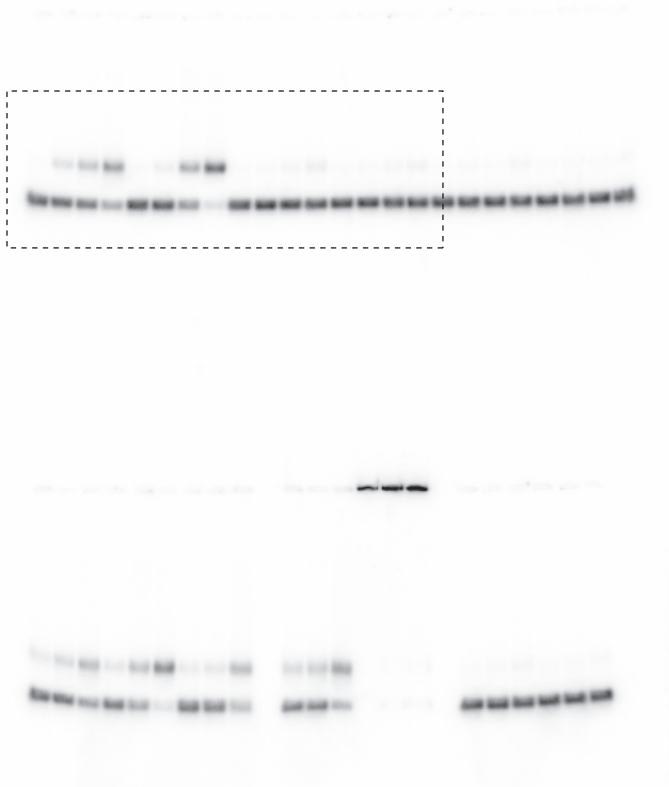

section used for Extended Data Fig. 10c

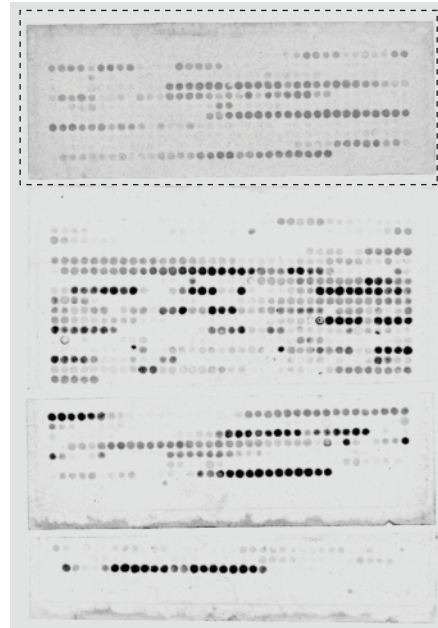

Fig. 1d

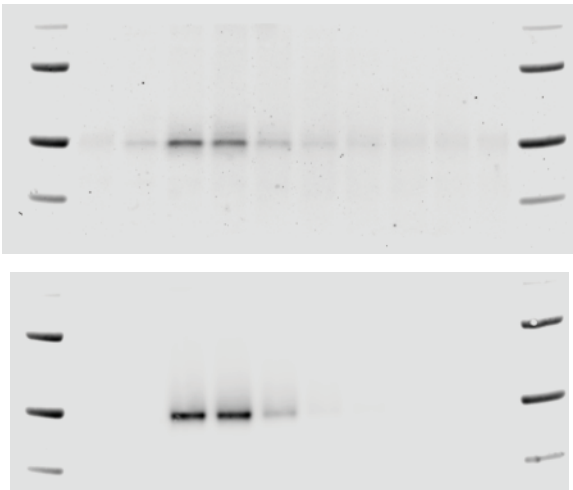

section used for Extended Data Fig. 10d

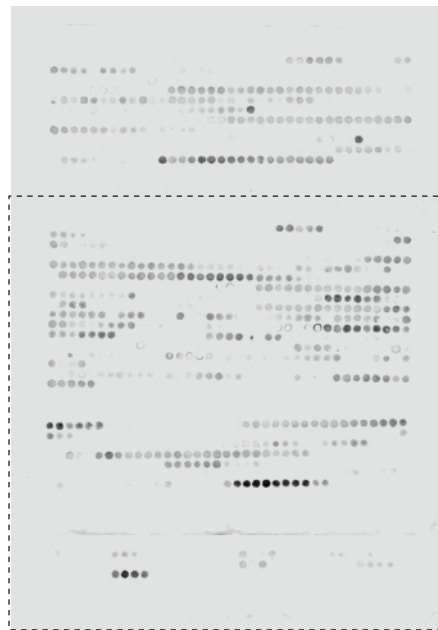

Extended Data Fig. 2c

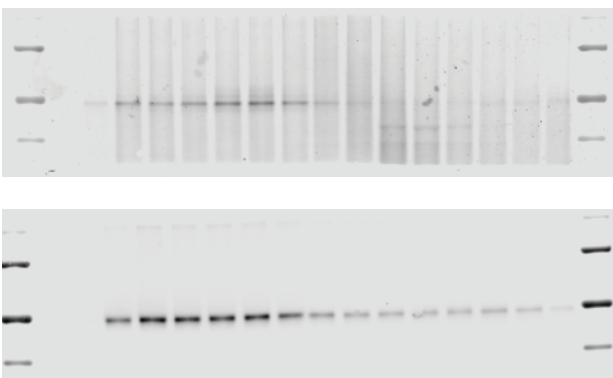

Supplement: 41586_2024_7347_MOESM1_ESM.pdf [file 41586_2024_7347_MOESM1_ESM.pdf]
